# Supplementary material for: Transcriptome analysis of bitter acid biosynthesis and precursor pathways in hop (Humulus lupulus)
Source: PubMed Central journal article supplement (PMC3564914; doi:10.1186/1471-2229-13-12), 2013-01-24
Supplement: 1471-2229-13-12-S4.pdf [file 1471-2229-13-12-S4.pdf]

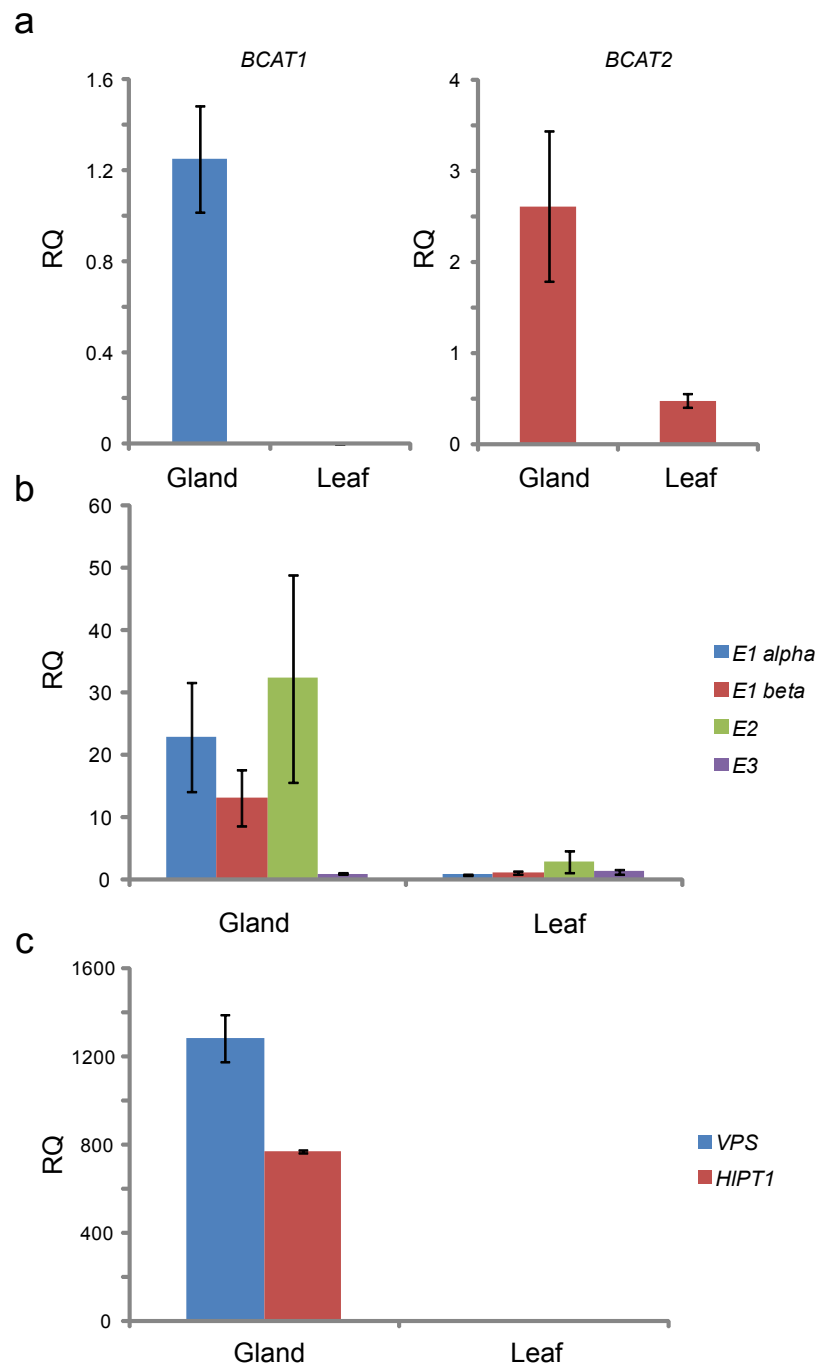

**Figure S1** – Relative abundance of select metabolic transcripts in lupulin gland and leaf samples as determined by qRT-PCR. Data is presented using relative quantitation (RQ) based on  $\Delta\Delta C_T$  values. Samples are normalized using  $\beta$ -tubulin.

a) qRT-PCR analysis of *HIBCAT1* and *HIBCAT2*. A single gland sample was used as reference.

b) qRT-PCR analysis of genes encoding enzymes of the BCKDH complex (ketoacid dehydrogenase  $E1\alpha$  and  $E1\beta$ , dihydrolipoyl acyltransferase ( $E2$ ), and dihydrolipoyl dehydrogenase ( $E3$ )). A single leaf sample was used as reference.

c) qRT-PCR analysis of *VPS* and *HIPT1*. A single leaf sample was used as reference. Data represents the mean and standard error,  $n=3$ . Transcript abundance between panels a, b and c is not directly comparable in this figure.
